# Supplementary material
Source: PubMed Central journal article supplement (PMC4644648)
Supplement: AEM.02688-15_zam999116787so1.pdf [file AEM.02688-15_zam999116787so1.pdf]

**TABLE S1** Sequences of oligonucleotides used for site-directed mutagenesis.

| Mutations | Oligonucleotide sequences                                                              |
|-----------|----------------------------------------------------------------------------------------|
| T49I      | 5'-tgattgccttccggaatctggattcccggatac-3'<br>5'-gtatccgggaatccagatttccggaaggcaatca-3'    |
| Y85F      | 5'-gtcatcaacagcgagcaattccgtctcatcgaac-3'<br>5'-gttcgatgagacggaattgctcgtgttgatgac-3'    |
| A91S      | 5'-gcaataccgtctcatcgaacaatcagcagctcgca-3'<br>5'-tgcgagctgctgattgttcgatgagacggtattgc-3' |
| M98K      | 5'-gcagctcgcaacaagatcaagtggtgctg-3'<br>5'-cagcaccaccttgatcttgttcgagctgc-3'             |
| I113N     | 5'-gccggctcgttgtaactccaatcgatcatc-3'<br>5'-gatgatcgattgggagttgtacaacgagccggc-3'        |
| Y199C     | 5'-cggcgcagcctgtacgctcggcc-3'<br>5'-ggccgagcgtacaggctgcgccg-3'                         |
| T310P     | 5'-gctgtagacccccgcccaatctcg-3'<br>5'-cgagatttgggcgggggtctagcagc-3'                     |
| R345C     | 5'-gagccgctcgagtgcgtcacaccg-3'<br>5'-cgggtgtgacgactcgagcggctc-3'                       |

**TABLE S2** Analytical conditions for mandelic acid and its derivatives.

| Acid Product                      | Column           | Mobile Phase        | Flow Speed<br>(mL/min) | Retention Time<br>(min) |                  |
|-----------------------------------|------------------|---------------------|------------------------|-------------------------|------------------|
|                                   |                  |                     |                        | <i>R</i>                | <i>S</i>         |
| mandelic acid                     | CHIRALEL-OJ-H    | 10% 2-propanol; 90% | 1.0                    | 19.3                    | 22.7             |
|                                   | 4.6×150 mm, 5 μm | hexane (0.1% TFA)   |                        |                         |                  |
| 2-F-mandelic acid                 | CHIRALEL-OJ-H    | 10% 2-propanol; 90% | 1.0                    | 15.8                    | 19.5             |
|                                   | 4.6×150 mm, 5 μm | hexane (0.1% TFA)   |                        |                         |                  |
| 2-Cl-mandelic acid                | CHIRALEL-OZ-RH   | 10% 2-propanol; 90% | 0.5                    | 19.0( <i>S</i> )        | 23.8( <i>R</i> ) |
|                                   | 4.6×150 mm, 5 μm | water (0.05% TFA)   |                        |                         |                  |
| 2-Br-mandelic acid                | CHIRALEL-OJ-H    | 10% 2-propanol; 90% | 1.0                    | 21.3                    | 28.4             |
|                                   | 4.6×150 mm, 5 μm | hexane (0.1% TFA)   |                        |                         |                  |
| 2-CH <sub>3</sub> -mandelic acid  | CHIRALEL-OJ-H    | 10% 2-propanol; 90% | 1.0                    | 16.8                    | 24.0             |
|                                   | 4.6×150 mm, 5 μm | hexane (0.1% TFA)   |                        |                         |                  |
| 2-OCH <sub>3</sub> -mandelic acid | CHIRALEL-OJ-H    | 10% 2-propanol; 90% | 1.0                    | 31.4                    | 34.7             |
|                                   | 4.6×150 mm, 5 μm | hexane (0.1% TFA)   |                        |                         |                  |
| 3-F-mandelic acid                 | CHIRALEL-OJ-H    | 5% 2-propanol; 95%  | 1.0                    | 21.5                    | 26.5             |
|                                   | 4.6×150 mm, 5 μm | hexane (0.1% TFA)   |                        |                         |                  |
| 3-Cl-mandelic acid                | CHIRALEL-OJ-H    | 5% 2-propanol; 95%  | 1.0                    | 19.0                    | 25.0             |
|                                   | 4.6×150 mm, 5 μm | hexane (0.1% TFA)   |                        |                         |                  |
| 3-Br-mandelic acid                | CHIRALEL-OJ-H    | 5% 2-propanol; 95%  | 1.0                    | 20.3                    | 26.4             |
|                                   | 4.6×150 mm, 5 μm | hexane (0.1% TFA)   |                        |                         |                  |
| 4-F-mandelic acid                 | CHIRALEL-OJ-H    | 5% 2-propanol; 95%  | 1.0                    | 25.0                    | 28.0             |
|                                   | 4.6×150 mm, 5 μm | hexane (0.1% TFA)   |                        |                         |                  |
| 4-Cl-mandelic acid                | Chirobiotic R    | 50% methanol;50%    | 0.5                    | 1.77( <i>S</i> )        | 2.18( <i>R</i> ) |
|                                   | 4.6×100 mm, 5 μm | water (0.1% HAC)    |                        |                         |                  |
| 4-Br-mandelic acid                | Chirobiotic R    | 50% methanol;50%    | 0.5                    | 4.17( <i>S</i> )        | 5.25( <i>R</i> ) |
|                                   | 4.6×100 mm, 5 μm | water (0.1% HAC)    |                        |                         |                  |

**TABLE S3** The enantioselectivity and relative activity of the BCJ2315 mutants based on random mutagenesis and site-directed mutagenesis.

| Mutants | <i>ee</i> (%)<br>(mutant) | Relative activity(%)<br>(mutant) | Mutations | <i>ee</i> (%)<br>(mutations) | Relative activity(%)<br>(mutations) |
|---------|---------------------------|----------------------------------|-----------|------------------------------|-------------------------------------|
| WT      | 89.2%                     | 100                              | -         | -                            | -                                   |
| M18     | 95.9±0.2                  | 87±5                             | T49S      | 95.9±0.2                     | 87±5                                |
| M338    | 98.3±0.2                  | 82±4                             | A91S      | 89.2±0.4                     | 98±4                                |
|         |                           |                                  | I113N     | 98.4±0.1                     | 81±4                                |
| M101    | 99.3±0.3                  | 75±5                             | M98K      | 89.3±0.3                     | 102±3                               |
|         |                           |                                  | Y199C     | 94.3±0.4                     | 201±5                               |
|         |                           |                                  | T310P     | 98.1±0.2                     | 33±6                                |
|         |                           |                                  | R345C     | 90.1±0.3                     | 99±3                                |
| M1332   | 99.3±0.2                  | 72±7                             | T49I      | 95.9±0.3                     | 78±6                                |
|         |                           |                                  | Y85F      | 88.9±0.5                     | 102±3                               |
|         |                           |                                  | I113N     | 98.4±0.1                     | 81±4                                |

**TABLE S4** The enantioselectivity and relative activity of the mutants based on site-saturation mutagenesis at selected four ‘hot spots’.

| Mutations | 49                  |               | 113                 |               | 199                 |               | 310                 |               |
|-----------|---------------------|---------------|---------------------|---------------|---------------------|---------------|---------------------|---------------|
|           | RA <sup>a</sup> (%) | <i>ee</i> (%) |
| A         | 84±3                | 96.3±0.4      | 102±2               | 94.1±0.7      | 273±12              | 95.6±0.8      | 104±4               | 89.5±1.2      |
| C         | 47±7                | 88.3±0.3      | 75±4                | 80.9±0.4      | 231±15              | 94.3±0.4      | 117±6               | 88.7±1.8      |
| D         | 52±7                | 92.8±0.5      | 2±1                 | >99.9         | 222±12              | 94±0.3        | 103±2               | 90.3±0.9      |
| E         | 26±4                | 99.0±0.2      | 23.9±1              | 90.6±0.4      | 191±15              | 95.1±0.4      | 118±7               | 90.1±0.8      |
| F         | 24±5                | 97.1±0.4      | 45±4                | 93.7±0.8      | 105±5               | 93.4±0.9      | 103±8               | 89.3±0.4      |
| G         | 72±4                | 97.3±0.7      | 6±3                 | >99.9         | 306±17              | 96.7±0.4      | 89±4                | 90.2±0.4      |
| H         | 80±5                | 88.8±0.6      | 2±1                 | 89.7±0.8      | 114±8               | 89.1±0.3      | 280±13              | 89.7±0.4      |
| I         | 83±6                | 95.6±0.3      | 100                 | 89.2±0.3      | 117±5               | 91.4±0.4      | 126±11              | 88.6±0.5      |
| K         | 16±8                | 94.8±0.5      | 1±1                 | >99.9         | 148±9               | 93.1±0.3      | 103±7               | 89.2±0.5      |
| L         | 98±3                | 92.8±0.7      | 188±11              | 77.1±1.2      | 177±7               | 92.3±0.4      | 132±9               | 89.9±0.7      |
| M         | 46±3                | 97.2±0.2      | 138±7               | 97.2±0.3      | 145±6               | 92.3±1.3      | 116±3               | 89.1±1.2      |
| N         | 105±2               | 76.1±0.8      | 74±5                | 98.4±0.3      | 140±7               | 90.9±0.5      | 100±3               | 88.9±0.4      |
| P         | 4±2                 | 87.1±0.9      | 61±9                | 93.2±0.2      | 179±9               | 92.3±0.5      | 38±8                | 98.1±0.2      |
| Q         | 96±5                | 93.7±0.3      | 29.7±3              | 96.2±0.3      | 230±11              | 93.8±0.7      | 99±4                | 89.5±1.1      |
| R         | 55±9                | 90.2±0.2      | 1±1                 | 95.8±0.2      | 217±6               | 89.1±0.3      | 17±9                | 92.5±0.5      |
| S         | 79±7                | 94.8±0.2      | 2±1                 | >99.9         | 324±13              | 93.5±0.4      | 125±3               | 88.2±1.1      |
| T         | 100                 | 89.2±0.9      | 32±3                | 96.1±0.1      | 185±9               | 93.4±0.9      | 100                 | 89.2±0.9      |
| V         | 45±3                | 92.6±0.2      | 99±4                | 89.5±0.2      | 145±8               | 92.5±1.2      | 118±5               | 88.4±0.4      |
| W         | 87±3                | 90.6±1.0      | 1±1                 | >99.9         | 121±7               | 93.5±1.5      | 96±7                | 89±1.2        |
| Y         | 16±5                | 96.6±0.5      | 2±1                 | 98.1±0.3      | 100                 | 89.2±0.9      | 119±4               | 88.9±1.0      |

<sup>a</sup> RA=Relative Activity

**TABLE S5** The enantioselectivity and relative activity of the double mutants

generated by combination of mutations.

| I113M+199 | Relative activity(%) | <i>ee</i> (%) |
|-----------|----------------------|---------------|
| A         | 286±11               | 98.4±0.2      |
| C         | 176±8                | 98.4±0.1      |
| D         | 231±5                | 98.1±0.2      |
| E         | 249±16               | 98.3±0.1      |
| F         | 110±3                | 97.6±0.3      |
| G         | 376±21               | 98.7±0.1      |
| H         | 153±16               | 97.1±0.3      |
| I         | 180±11               | 97.6±0.4      |
| K         | 218±9                | 98.0±0.2      |
| L         | 154±6                | 97.9±0.4      |
| M         | 199±11               | 97.8±0.3      |
| N         | 102±4                | 97.8±0.3      |
| P         | 225±16               | 97.5±0.2      |
| Q         | 219±9                | 98.1±0.4      |
| R         | 186±7                | 97.5±0.3      |
| S         | 263±8                | 98.6±0.3      |
| T         | 263±9                | 98±0.4        |
| V         | 243±14               | 97.6±0.4      |
| W         | 147±8                | 97.5±0.3      |
| Y         | 138±7                | 97.2±0.2      |
